# Supplementary material
Source: publisher figshare collection journal article supplement (https://frontiersin.figshare.com/ndownloader/files/15593045)
Supplement: Supplementary file 1 [file 15593045]

Table 1: Qualitative summary of digital fabrication methods for large-scale urban scenarios.

| **Technology** | **Applicability in practice** | **Requirements** | **Limitations in applicability** | **Role of citizens | Form of participation** | |
| --- | --- | --- | --- | --- | --- |
|  |  |  |  | **Off-site assembly | planning and design** | **On-site assembly** |
| **DfMA line (Design for Manufacture and Assembly line)** | Yes, applied in arch. scales | Customization of line units, high precision | Heavy, big investment necessary, some unsolved technical and scientific problems, urban logistics | Yes / on-line catalogues, library of components | N/a |
| **Automated Building Construction Systems (ABCS, RCACS)** | Yes, Applied in arch. Scales, scalable to Sky Factories | Control Centre, high precision, heavy construction supportive elements | Heavy, big investment necessary, some unsolved technical and scientific problems, urban logistics | Yes / on-line catalogues, library of components | N/a |
| **Contour Crafting and D-Shape | Single-run 3D printing (Sousa 2016)** | Yes, Applied in arch. Scales | Control Centre, material deployment strategies | Heavy, big investment necessary, some unsolved technical and scientific problems, urban logistics | Yes / on-line catalogues, library of components | N/a |
| **Pre-cut & Pre-fab Discrete Elements** | Yes, applied in arch. Scales, Scalable e.g. for Informal Settlements | Rules for configurations, manuals for end-users, improvisation, collaboration, sharing, negotiations | Simplification is necessary for non-experts, low-tech principles | Yes / on-line catalogues, library of components | Yes, man-machine interaction, improvisation, collaboration |
| **Cable-driven systems (e.g. RoboCrane, SpideRobot)** | Not yet, applied in proof concepts in small scales, scalable to Robotic Networks | Development of Large-scale gantries, sensing, material supply, precision, urban logistics | Large-scale proof concept is necessary | Yes / on-line catalogues, library of components | Post-assemblies of individual units, participatory constructions, improvisation, collaboration |
| **Citizens’ user digital interfaces linked with fabrication methods, online catalogues** | Yes, library of components allowing aggregations, formations | Data processing and exchange, sensing, awareness of components | Link to construction deliveries and other urban parties as a part of Internet of Things | Yes / on-line catalogues, library of components | Yes, man-machine interaction, improvisation, collaboration |
| **3D printing, complex assemblies using robotic arms, mobile Robotic Units** | Yes, applied in arch. Scales, scalable as attached multi-tasks systems to shipping cranes in city port areas | Precision, data processing and exchange, complex tasks, sensing, large-scale manipulators (cranes) | Applicability only with large-scale gantries or cranes for specific tasks (in large-scale deliveries), | Yes / on-line catalogues, library of components | Post-assemblies of individual units, man-machine interaction |
| **Aerial Additive Building Manufacturing** | Not yet, applied in small scale proof concepts | Complex tasks, data processing and exchange, sensing, remote control | Proof concept for larger scale is necessary | N/a | N/a |
| **Large colony of small building robotics** | Not yet, applied in small scale proof concepts | Complex tasks, data processing and exchange, sensing, remote control, collaboration between components | In development, Proof concept for larger scale is necessary | Yes / on-line catalogues, library of components | Yes, man-machine interaction |
| **Self-assemblies from self-aware components** | Not yet, applied in small scale proof concepts | Behavioral strategies, bottom-up rule-sets, sensing, data exchange platforms | Large-scale construction and smart hardware development | Yes / on-line catalogues, library of components, formations, aggregations | Yes, man-machine interaction |
| **Pneumatic systems and membranes** | Yes, applied in arch. Scales, scalable to temporary urban constructions | Precise prefabrication, sensing | Urban logistics | No, only catalogue of components (on-line interface) | Yes, man-machine interaction |
